# Supplementary material
Source: PubMed Central journal article supplement (PMC524438)
Supplement: pnas_101_43_15464__1.pdf [file pnas_101_43_15464__1.pdf]

**Table 3. List of microsatellites with their amplification primers**

| Microsaellite | 8.1 allele | Sequences (5'→ 3')           |                              |
|---------------|------------|------------------------------|------------------------------|
|               |            | Forward                      | Reverse                      |
| CTG-Notch4    | 232        | GAAACAGCTCAGACGTGAGG         | ACCTCTGGGTCTGACCACTG         |
| D6S1615       | 135        | CCTGGGTAACAGAGCAAG           | TCTCCAGAGAGGTGGG             |
| 9N-1          | 310        | CCTGAAGACAGAGAGGTATC         | CTTTCCTAACTTCTTGGGTTG        |
| 82-2          | 173        | CAGTTAGGACATGTGTCCCTA        | CTTCCCAATTTACTTGCTCTC        |
| D6S273        | 140        | GCAACTTTTCTGTCAATCCA         | ACCAAATTTCAAATTTTCGG         |
| G6            | 99         | GTCCAGTAATACTGCAGATAC        | CAAGCAGCTACAGTTTGCTC         |
| BAT3          | 157        | TGACTGCCCGCGTCTACTGCCTT      | GGAAGTGACGGTCCGTGGGGAA       |
| 82-1          | 92         | CAGGAGCCAGGATGGAGACC         | AGACCCTGTCTCCCTGTCTC         |
| 82-3          | 169        | CATTCCAGCCTGGGCGACAG         | GAAGCAAGCTGATTGGTGAAGC       |
| TNFd          | 1          | AGATCCTTCCCTGTGAGTTCTGCT     | CACTATCGCAAGGCTGAGGCAGGA     |
| TNFa          | 2          | GCCTCTAGATTTTCATCCAGCCACA    | CCTCTCTCCCCTGCAACACACA       |
| TNFb          | 3          | GCACTCCAGCCTAGGCCACAGA       | GTGTGTGTTGCAGGGGAGAGAG       |
| C1-2-A        | 256        | AATAGCCATGAGAAGCTATGTGGGGGAG | CTACCTCCTTGCCAACTTGCTGTTTGTG |
| C1-2-C        | 235        | CTCCTGCTTTACACACACCT         | GAGCAGAAGGGAGATGAAATGG       |
| STR-MICA      | 184        | CCTTACCATCTCCAGAACTGC        | CCTTTTTTTCAGGGAAAGTGC        |
| MIB           | 247        | CAGAAACTGAGGTTTCCAG          | CCACAGTCTCTATCAGTCCA         |
| C1-2-5        | 207        | CAGTAGTAAGCCAGAAGCTATTAC     | GATCCAGGCAAAAGTCAAGC         |
| C1-4-3        | 269        | CTACTCGGGAAGCTGAGACA         | AACAGTCTGGATTAACCTGGAG       |
| C1-4-4        | 144        | CTCCAGACGCGGCAACAGAGTG       | GAAATTTTGTATAAGGTAAG         |
| C1-3-2        | 356        | TAGGGATGGTCCCAAACGTG         | CCCGTGCAGGACTGATCTCC         |

| Microstaellite | 8.1 allele | Sequences (5'→ 3')        |                            |
|----------------|------------|---------------------------|----------------------------|
|                |            | Forward                   | Reverse                    |
| C2-4-5         | 278        | GCTCCACATTTTTCTAATAGGGTTC | CAGCATGGTGAAACCCAGTC       |
| C3-2-11        | 185        | CTGAGGTCTGTGGTCATAAC      | TCCTTACAGCAGAGATATGTGG     |
| C3-2-12        | 142        | TGTCATTCTGATCCAGGCAGGCATC | GGAACCTTGAGCAGTGAGCTCCTATG |
| D6S265         | 128        | ACGTTCGTACCCATTAACCT      | ATCGAGGTAAACAGCAGAAA       |

The allele associated with the 8.1 haplotype is referenced by using its size in bp with the exception of the TNF a, b, and d markers.
