# Supplementary material
Source: PubMed Central journal article supplement (PMC524438)

**A**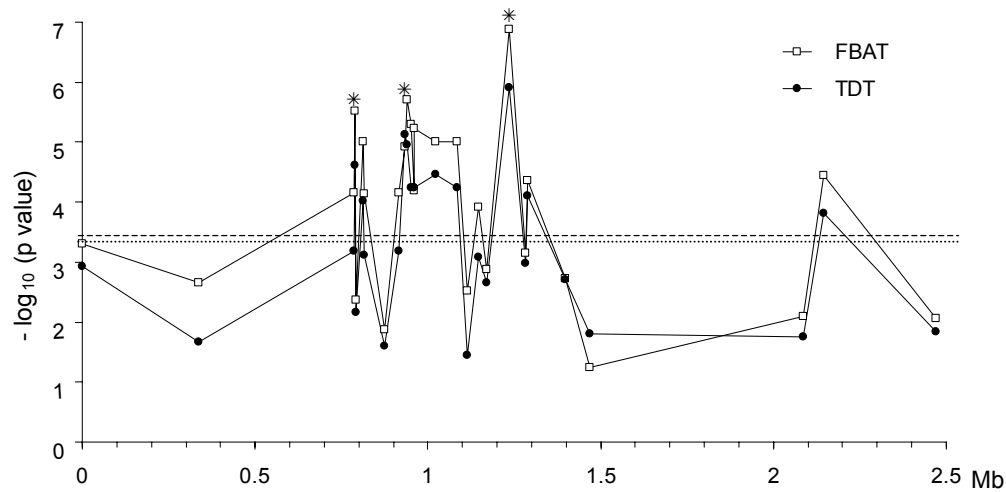**B**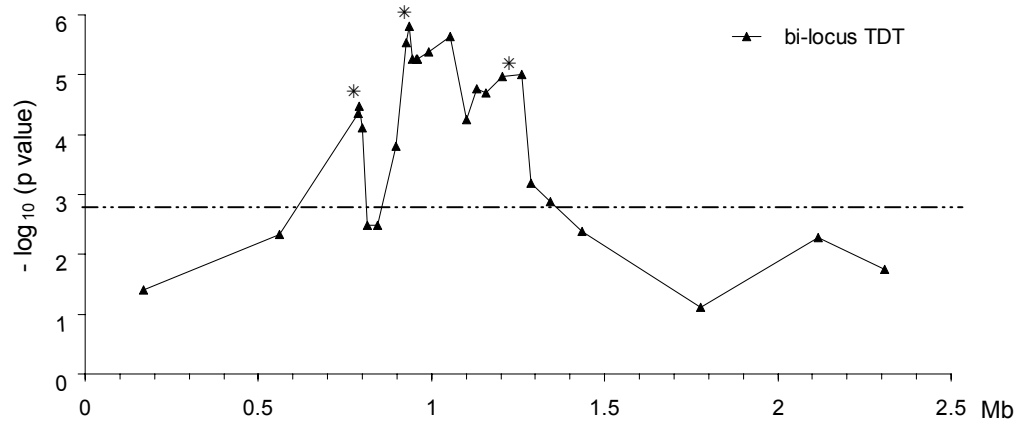

Class

II

III

I

Supplement: pnas_101_43_15464__3.pdf [file pnas_101_43_15464__3.pdf]

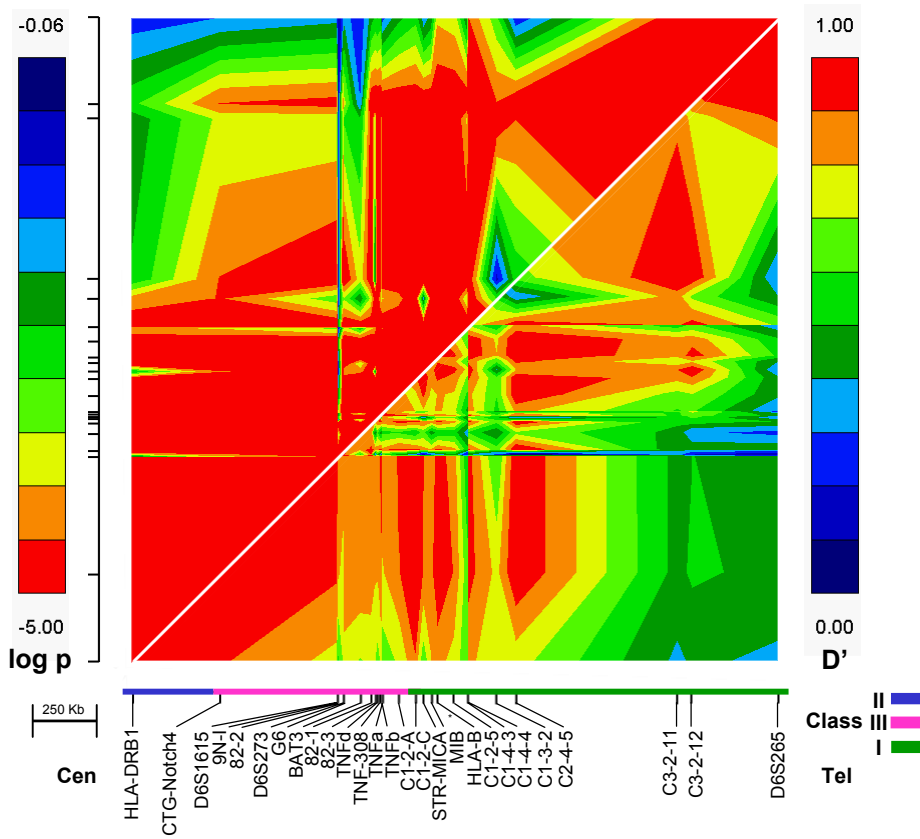

Supplement: pnas_101_43_15464__4.pdf [file pnas_101_43_15464__4.pdf]

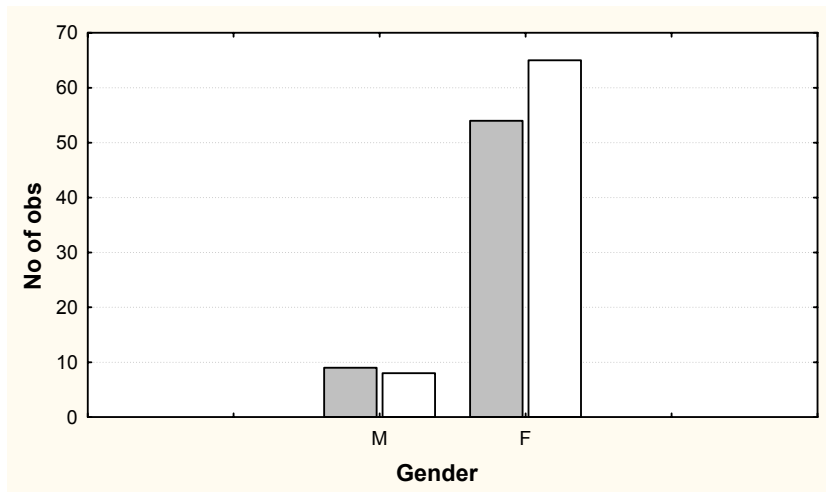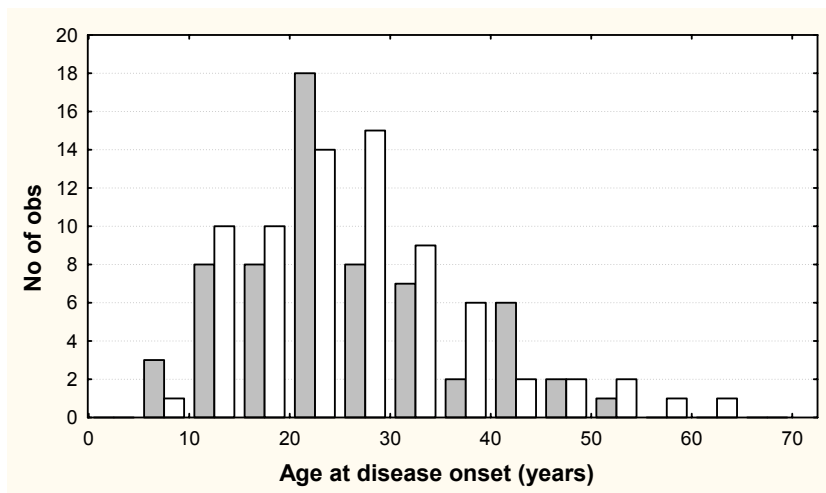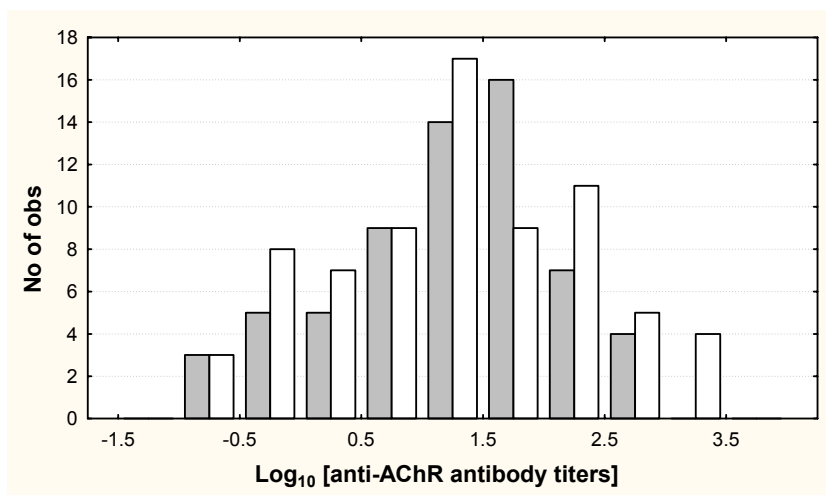

Supplement: pnas_101_43_15464__5.pdf [file pnas_101_43_15464__5.pdf]

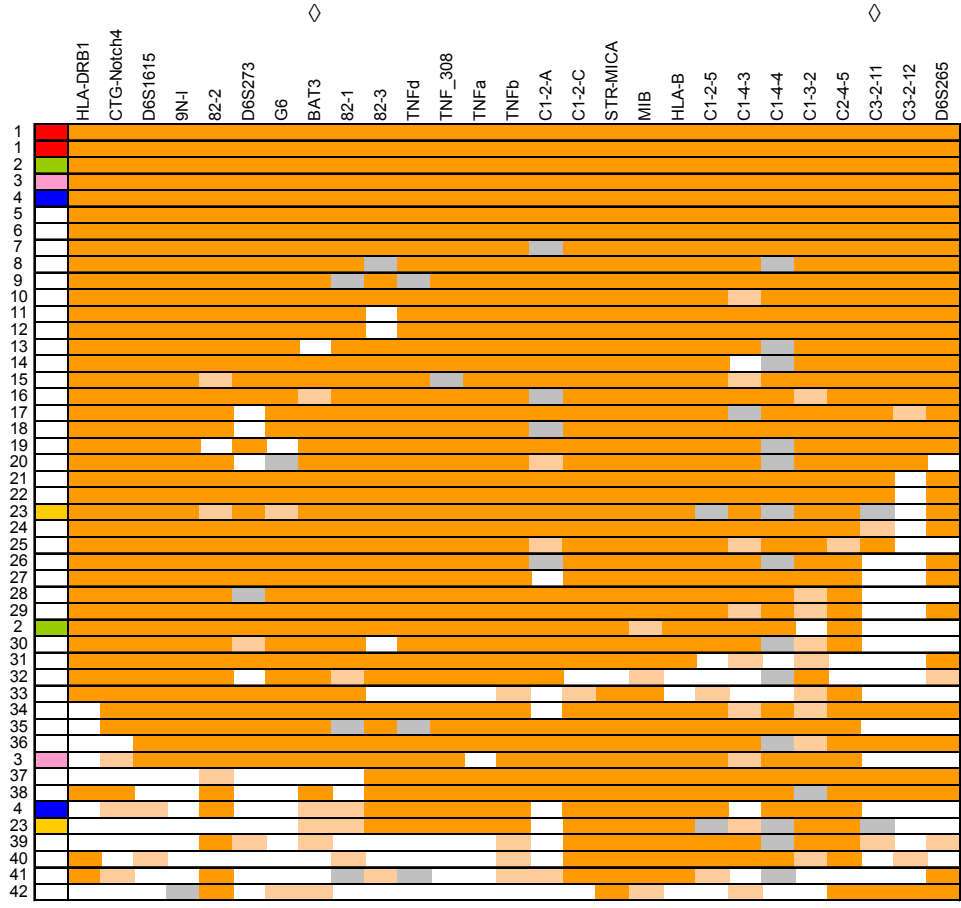

Supplement: pnas_101_43_15464__6.pdf [file pnas_101_43_15464__6.pdf]

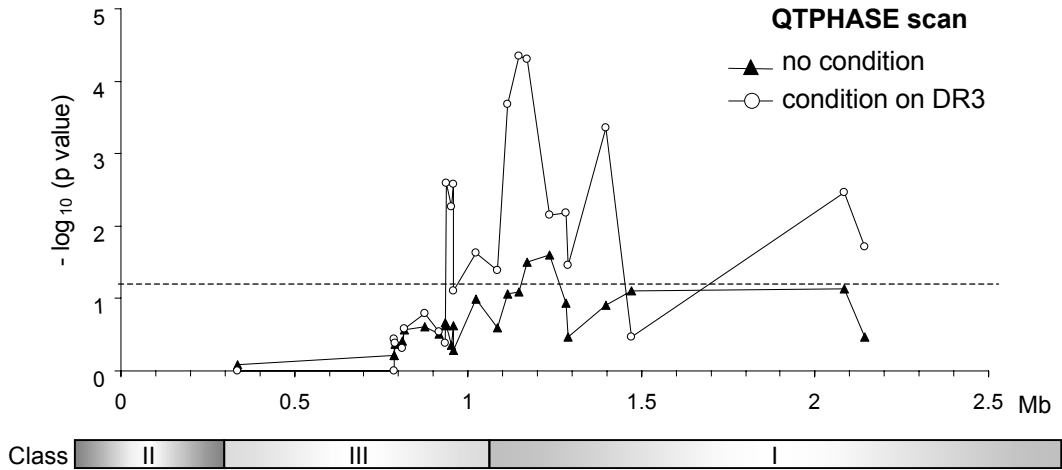

Supplement: pnas_101_43_15464__7.pdf [file pnas_101_43_15464__7.pdf]
